# Supplementary material for: The effect of rotenone contamination on high-resolution mitochondrial respiration experiments
Source: PeerJ. 2025 Aug 14;13:e19879. doi: 10.7717/peerj.19879 (PMC12358111; doi:10.7717/peerj.19879)
Supplement: Supplemental Information 1 [file peerj-13-19879-s001.xlsx]

## Sheet: Sheet1
ID	TIME	CHAMBERS	ROT	CIL	CIP	CIIIP	CIIIC	CS	experiment
1P1	PRE	ALL	yes	30.9644	0.62755	66.818	59.4683		one
1P2	PRE	ALL	yes	19.7384	9.1687	66.5131	69.4233		one
1P3	PRE	ALL	yes	10.8323	10.6616	78.0733	88.178		one
1P4	PRE	ALL	yes	9.45977	3.41993	101.313	106.453		one
1P5	PRE	ALL	yes	18.6316	14.5342	76.6933	83.1752		one
1P6	PRE	ALL	yes	7.321	6.69797	76.3111	88.661		one
3P1	PRE	ALL	yes	17.4322	91.5256	96.9487	78.7467	6.29	three
3P1	6H	ALL	yes	22.7547	48.5649	73.3857	71.8232	5.92	three
3P2	6H	ALL	yes	16.1385	85.7981	100.471	106.873	5.96	three
3P2	PRE	ALL	yes	12.6875	86.4552	108.555	115.789	6.2	three
3P3	PRE	ALL	yes	10.1923	46.0688	47.5851	50.562	3.47	three
3P3	6H	ALL	yes	7.78623	29.8454	22.3364	21.3388	4.66	three
3P5	PRE	ALL	yes	11.6055	76.1963	91.6671	97.0408	3.64	three
3P5	6H	ALL	yes	10.9982	48.3867	61.3421	63.7044	3.98	three
2P1	PRE	ALL	yes	17.2112	30.3447	52.0838	64.5523		two
2P2	PRE	ALL	yes	25.5969	48.6619	78.3013	90.1173		two
2P3	PRE	ALL	yes	24.9464	72.7845	108.56	116.142		two
2P4	PRE	ALL	yes	33.9414	29.5436	52.3173	58.1768		two
2P5	PRE	ALL	yes	3.75157	50.0307	84.8032	95.8362		two
2P6	PRE	ALL	yes	11.421	72.5114	108.107	127.593		two
2P7	PRE	ALL	yes	13.2398	61.3777	90.0567	103.825		two
2P8	PRE	ALL	yes	10.8221	20.2529	51.8689	63.2044		two
2P9	PRE	ALL	yes	17.3303	111.551	163.395	189.048		two
2P10	PRE	ALL	yes	9.35083	60.7712	93.3218	109.992		two
2P11	PRE	ALL	yes	14.5113	34.0105	60.5029	64.8946		two
2P12	PRE	ALL	yes	19.2056	35.2117	55.5755	58.8504		two
4P9A	PRE	ALL	no	16.4684	66.9934	100.893	119.072	2.3	four
4P9A	3H	ALL	no	26.5703	69.7448	103.485	143.673	3	four
4P9B	3H	ALL	no	18.7225	77.2045	111.019	131.032	2.1	four
4P9B	PRE	ALL	no	17.4109	65.1649	104.152	137.392	2.2	four
4P10A	3H	ALL	no	16.8928	88.085	122.402	165.067		four
4P10A	PRE	ALL	no	20.6392	99.6007	141.05	195.609		four
4P10B	PRE	ALL	no	22.0296	105.994	148.901	196.212	2.4	four
4P10B	3H	ALL	no	24.5553	92.8977	129.403	171.811	2.7	four
4P1A	3H	ALL	no	11.5607	21.0231	52.4454	61.0658	2.3	four
4P1A	PRE	ALL	no	10.2412	17.8816	44.3251	55.8772	2.8	four
4P2A	PRE	ALL	no	27.8278	80.3697	145.917	167.211	1.4	four
4P2A	3H	ALL	no	24.3894	42.4183	64.5586	79.831	2	four
4P2B	PRE	ALL	no	31.9126	82.4744	106.988	127.858	0.9	four
4P2B	3H	ALL	no	19.4884	69.8938	94.5041	112.416	2.9	four
4P3A	3H	ALL	no	37.3445	46.385	92.4852	58.7234	1.7	four
4P3A	PRE	ALL	no	26.3248	41.1121	78.3649	94.4542	1.8	four
4P3B	PRE	ALL	no	7.4179	17.0113	34.056	36.8624	2.1	four
4P3B	3H	ALL	no	24.7897	42.9215	70.7249	80.5496	2.7	four
4P4A	3H	ALL	no	21.018	33.7801	44.0299	55.8909	2.6	four
4P4A	PRE	ALL	no	22.2334	67.5	94.7567	97.7427	2.6	four
4P4B	3H	ALL	no	42.6391	48.8895	64.3803	119.699	2.2	four
4P4B	PRE	ALL	no	23.2446	54.5981	75.7843	87.2592	2.6	four
4P5A	3H	ALL	no	22.8985	32.6705	94.1036	100.545	3.4	four
4P5A	PRE	ALL	no	28.984	45.9413	70.7023	91.5933	3.4	four
4P5B	3H	ALL	no	30.9661	61.4884	90.5695	129.383	1.7	four
4P5B	PRE	ALL	no	25.0331	75.3946	104.016	116.627	3.4	four
4P6A	3H	ALL	no	47.7992	30.4041	84.9392	84.8847	1.4	four
4P6A	PRE	ALL	no	11.5834	46.9668	87.3739	90.6697	1.8	four
4P6B	3H	ALL	no	22.0438	62.7	86.8418	115.173	1.6	four
4P6B	PRE	ALL	no	31.2576	14.9463	24.3349	42.8399	1.8	four
4P7A	PRE	ALL	no	29.1237	87.17	123.034	134.893	2.8	four
4P7A	3H	ALL	no	27.0589	24.4531	40.3606	75.5139	3	four
4P8A	3H	ALL	no	21.8433	80.2277	99.1128	94.32	3.3	four
4P8A	PRE	ALL	no	17.9007	84.175	128.693	145.697	3.7	four
4P8B	PRE	ALL	no	20.0831	99.9584	145.886	184.448	3	four
4P8B	3H	ALL	no	19.6602	94.7694	132.7	170.387	3.6	four
1P1	PRE	ALL	no	19.4308	21.7935	65.1046	71.044		one
1P2	PRE	ALL	no	13.7916	76.2744	110.359	127.471		one
1P3	PRE	ALL	no	7.84517	79.1074	91.4284	112.005		one
1P4	PRE	ALL	no	14.6864	92.3007	143.569	148.143		one
1P5	PRE	ALL	no	7.8636	64.4896	81.9952	94.6239		one
1P6	PRE	ALL	no	7.27663	77.9134	123.03	151.445		one
3P1	6H	ALL	no	17.6825	55.9028	64.3828	65.0398		three
3P1	PRE	ALL	no	17.4322	91.5256	96.9487	79.9514		three
3P3	6H	ALL	no	25.9229	53.0592	50.519	57.6344		three
3P3	PRE	ALL	no	13.3548	54.0689	77.8475	66.3103		three
3P4	6H	ALL	no	20.3993	76.5912	84.0733	97.2422	4.78	three
3P4	PRE	ALL	no	12.5958	49.5162	57.9541	72.6896	4.88	three
3P5	PRE	ALL	no	16.6664	70.3846	75.7657	74.9809		three
3P5	6H	ALL	no	13.4673	59.7073	76.719	75.3398		three
2P1	PRE	ALL	no	16.3771	33.6682	56.4036	63.2553		two
2P2	PRE	ALL	no	8.95277	50.9866	86.7696	91.9754		two
2P3	PRE	ALL	no	12.6126	76.5354	116.472	127.472		two
2P4	PRE	ALL	no	12.7741	49.4949	75.7002	87.6792		two
2P5	PRE	ALL	no	16.1905	58.1064	83.3099	106.699		two
2P6	PRE	ALL	no	9.40107	66.4389	95.1306	104.29		two
2P7	PRE	ALL	no	3.66975	60.5666	93.0957	105.561		two
2P8	PRE	ALL	no	15.7819	60.5576	97.9839	105.182		two
2P9	PRE	ALL	no	13.3998	105.931	150.516	188.255		two
2P10	PRE	ALL	no	26.6389	81.6843	110.241	121.312		two
2P11	PRE	ALL	no	23.7639	52.2519	89.2785	102.499		two
2P12	PRE	ALL	no	17.709	50.7501	76.8367	81.8605		two
